# Supplementary material
Source: HighWire-hosted journal article supplement (https://gpsych.bmj.com/content/36/1/e100895)
Supplement: inline-supplementary-material-1 [file inline-supplementary-material-1.pdf]

**Supplementary Table 1** The correlated of total score BDI and HAMD-24 with subscale of MoCA-BC and subscale of PRMQ

|                                    | BDI <sup>a</sup> |          | HAMD-24 <sup>b</sup> |          |
|------------------------------------|------------------|----------|----------------------|----------|
|                                    | <i>r</i>         | <i>p</i> | <i>r</i>             | <i>p</i> |
| <b>demographic characteristics</b> |                  |          |                      |          |
| gender                             | -0.201           | 0.070    | -0.073               | 0.515    |
| characteristic                     | 0.093            | 0.406    | 0.107                | 0.341    |
| Marital status                     | 0.097            | 0.384    | 0.157                | 0.158    |
| Education years                    | -0.242*          | 0.029    | -0.313**             | 0.004    |
| Income of monthly employment       | -0.266*          | 0.016    | -0.163               | 0.142    |
| Family pattern                     | 0.047            | 0.676    | -0.107               | 0.337    |
|                                    | 0.017            | 0.879    | 0.108                | 0.336    |
| <b>MoCA-BC<sup>c</sup></b>         |                  |          |                      |          |
| Attention                          | -0.052           | 0.644    | -0.074               | 0.507    |
| Delayed recall                     | -0.177           | 0.112    | -0.164               | 0.141    |
| Total score                        | -0.193           | 0.083    | -0.176               | 0.114    |
| <b>PRMQ<sup>d</sup></b>            |                  |          |                      |          |
| Prospective memory failure         | 0.293**          | 0.007    | 0.234*               | 0.034    |
| Retrospective memory failure       | 0.355**          | 0.001    | 0.190                | 0.087    |

Note: a. BDI: Beck Depression Inventory total score, b. HAMD-24: Hamilton Depression Rating Scale-24 total score, c. MoCA-BC: Montreal Cognitive Assessment-Basic Section, d. PRMQ: Prospective and Retrospective memory questionnaire, \* $p \leq 0.05$ , \*\* $p \leq 0.01$ , \*\*\* $p \leq 0.001$ .
